# Supplementary material
Source: HighWire-hosted journal article supplement (https://www.highwirestage.com/highwire/filestream/102614/field_highwire_adjunct_files/0/0080.pdf)
Supplement: 0080.pdf [file 0080.pdf]

# Supplemental Materials

## Inclusion/Exclusion Criteria

Patients were included if the following criteria were met:

- 1) Presented with large vessel occlusion of the internal carotid artery, first segment of the middle cerebral artery, or second segment of the middle cerebral artery
- 2) Baseline non-contrast CT and CT angiography present, with uniform opacification of the superior sagittal, straight, transverse, and sigmoid sinuses to the level of the jugular bulb to allow VO determination
- 3) Interpretable CT perfusion or magnetic resonance perfusion imaging present
- 4) Interpretable digital subtraction angiography images present to allow final TICI score assignment after thrombectomy

Patients were excluded by the following criteria:

- 1) Poor CT angiography image quality due to excessive patient motion or incomplete opacification of the major dural venous sinuses indicating poor study quality
- 2) Poor CT perfusion or magnetic resonance perfusion image quality due to excessive motion or failed contrast bolus
- 3) Absence of at least 1 follow-up head non-contrast CT/MRI examination within 72 hours of thrombectomy or hospital admission

Of the 722 patients assessed for eligibility, data from 649 patients were reported in a previous study on the correlation between tissue-level collaterals and VO profiles in AIS patients.<sup>13</sup> Data from 565 patients were reported in another study which assessed the correlation between pre-treatment VO profiles and

thrombectomy success.<sup>6</sup> A total of 580 patients were included into a previous study which assessed the correlation between VO profiles and ischemic edema formation in AIS patients after vessel reperfusion treatment.<sup>14</sup> A recent study which introduced a comprehensive approach of cerebral blood flow in ischemic stroke included 647 patients.<sup>15</sup>

## Supplementary Tables

**Supplementary Table 1. Functional outcomes at 90 days by venous outflow status**

| mRS                                              | CVO+<br>(n = 296) | CVO-<br>(n = 352) | p-value |
|--------------------------------------------------|-------------------|-------------------|---------|
| mRS 0, n (%)                                     | 67 (23%)          | 7 (2%)            | <0.001  |
| mRS 1, n (%)                                     | 75 (25%)          | 19 (5%)           |         |
| mRS 2, n (%)                                     | 52 (18%)          | 11 (3%)           |         |
| mRS 3, n (%)                                     | 38 (13%)          | 30 (8%)           |         |
| mRS 4, n (%)                                     | 34 (11%)          | 83 (24%)          |         |
| mRS 5, n (%)                                     | 13 (4%)           | 78 (22%)          |         |
| mRS 6, n (%)                                     | 17 (6%)           | 124 (35%)         |         |
| Good to Excellent Functional Status              |                   |                   |         |
| Functional Independence<br>(mRS 0-2), n (%)      | 194 (66%)         | 37 (11%)          | <0.001  |
| Excellent Functional Outcome<br>(mRS 0-1), n (%) | 142 (48%)         | 26 (7%)           | <0.001  |

**Supplementary Table 2. Technical outcomes by venous outflow status**

| <b>Post-thrombectomy<br/>TICI rating</b> | <b>CVO+<br/>(n = 313)</b> | <b>CVO-<br/>(n = 358)</b> | <b>p-value</b> |
|------------------------------------------|---------------------------|---------------------------|----------------|
| TICI 0                                   | 22 (7%)                   | 48 (13%)                  | <0.001         |

|                                       |           |           |        |
|---------------------------------------|-----------|-----------|--------|
| TICI 1                                | 5 (2%)    | 8 (2%)    |        |
| TICI 2a                               | 16 (5%)   | 31 (9%)   |        |
| TICI 2b                               | 104 (33%) | 129 (36%) |        |
| TICI 2c                               | 17 (5%)   | 14 (4%)   |        |
| TICI 3                                | 149 (48%) | 128 (36%) |        |
| Good to Excellent Functional Status   |           |           |        |
| Successful Reperfusion<br>(TICI ≥ 2b) | 270 (86%) | 271 (76%) | <0.001 |
| Excellent Reperfusion<br>(TICI 2c/3)  | 166 (53%) | 142 (40%) | <0.001 |
